# Supplementary material for: Clinical Characteristics and Diagnostic Prediction of Severe Fever with Thrombocytopenia Syndrome and Rickettsiosis in the Co-Endemic Wakayama Prefecture, Japan
Source: MDPI journal article supplement (doi:10.3390/medicina59112024), 2023-11-17
Supplement: s1 [file s1]

## Supplementary Material

**Table S1.** Patient clinical characteristics at diagnosis between Japanese spotted fever and scrub typhus.

| Characteristics                         | Total ( <i>n</i> = 45) | JSF ( <i>n</i> = 26) | ST ( <i>n</i> = 19) | <i>p</i> -value |
|-----------------------------------------|------------------------|----------------------|---------------------|-----------------|
| age (years)                             |                        |                      |                     | 0.43            |
| median [IQR]                            | 79 [69–85]             | 80 [74–85]           | 75 [65–85]          |                 |
| sex, <i>n</i> (%)                       |                        |                      |                     | 0.03            |
| male                                    | 20 (44)                | 8 (31)               | 12 (63)             |                 |
| female                                  | 25 (56)                | 18 (69)              | 7 (37)              |                 |
| comorbidities, <i>n</i> (%)             |                        |                      |                     |                 |
| hypertension                            | 15 (33)                | 8 (31)               | 7 (37)              | 0.67            |
| diabetes mellitus                       | 4 (9)                  | 2 (8)                | 2 (11)              | 0.74            |
| hepatic disease                         | 1 (2)                  | 0 (0)                | 1 (5)               | 0.24            |
| chronic kidney disease                  | 0 (0)                  | 0 (0)                | 0 (0)               |                 |
| cardiac disease                         | 11 (24)                | 6 (23)               | 5 (26)              | 0.8             |
| pulmonary disease                       | 1 (2)                  | 1 (4)                | 0 (0)               | 0.39            |
| cancer                                  | 5 (11)                 | 1 (4)                | 4 (21)              | 0.07            |
| season, <i>n</i> (%)                    |                        |                      |                     | <0.001          |
| spring                                  | 4 (9)                  | 4 (15)               | 0 (0)               |                 |
| summer                                  | 17 (38)                | 17 (65)              | 0 (0)               |                 |
| autumn                                  | 16 (36)                | 5 (19)               | 11 (58)             |                 |
| winter                                  | 8 (18)                 | 0 (0)                | 8 (42)              |                 |
| season group                            |                        |                      |                     | <0.001          |
| spring–summer                           | 21 (47)                | 21 (81)              | 0 (0)               |                 |
| autumn–winter                           | 24 (53)                | 5 (19)               | 19 (100)            |                 |
| eschar, <i>n</i> (%)                    |                        |                      |                     | 0.036           |
| presence                                | 33 (73)                | 16 (62)              | 17 (89)             |                 |
| skin rash, <i>n</i> (%)                 |                        |                      |                     | 0.22            |
| presence                                | 43 (96)                | 24 (92)              | 19 (100)            |                 |
| gastrointestinal symptoms, <i>n</i> (%) |                        |                      |                     |                 |
| vomiting                                | 0 (0)                  | 0 (0)                | 0 (0)               |                 |
| abdominal pain                          | 0 (0)                  | 0 (0)                | 0 (0)               |                 |
| diarrhea                                | 0 (0)                  | 0 (0)                | 0 (0)               |                 |
| >2 symptoms                             | 0 (0)                  | 0 (0)                | 0 (0)               |                 |

IQR, interquartile range; JSF, Japanese spotted fever; ST, scrub typhus

**Table S2.** Clinical laboratory findings at diagnosis between Japanese spotted fever and scrub typhus.

| Variable                | Total ( <i>n</i> = 45) | JSF ( <i>n</i> = 26) | ST ( <i>n</i> = 19) | p-value |
|-------------------------|------------------------|----------------------|---------------------|---------|
| WBC ( $\times 10^9/L$ ) | <i>n</i> = 45          | <i>n</i> = 26        | <i>n</i> = 19       | 0.073   |
| median [IQR]            | 7.8 [5.90–9.20]        | 8.15 [6.50–10.04]    | 6.5 [5.3–8.4]       |         |
| Hb (g/dL)               | <i>n</i> = 45          | <i>n</i> = 26        | <i>n</i> = 19       | 0.051   |
| median [IQR]            | 13.3 [12.0–14.5]       | 12.6 [11.4–14.2]     | 13.6 [12.7–14.8]    |         |
| PLT ( $\times 10^9/L$ ) | <i>n</i> = 45          | <i>n</i> = 26        | <i>n</i> = 19       | 0.047   |
| median [IQR]            | 11.8 [9.60–16.1]       | 11.25 [8.10–13.3]    | 13.1 [10.5–18.2]    |         |
| AST (IU/L)              | <i>n</i> = 45          | <i>n</i> = 26        | <i>n</i> = 19       | 0.73    |
| median [IQR]            | 53 [39–79]             | 53.5 [35–108]        | 53 [43–62]          |         |
| ALT (IU/L)              | <i>n</i> = 45          | <i>n</i> = 26        | <i>n</i> = 19       | 0.58    |
| median [IQR]            | 42 [25–61]             | 42 [27–74]           | 42 [23–53]          |         |
| T-Bil (IU/L)            | <i>n</i> = 44          | <i>n</i> = 26        | <i>n</i> = 18       | 0.023   |
| median [IQR]            | 0.6 [0.5–0.9]          | 0.6 [0.5–0.7]        | 0.9 [0.6–1.2]       |         |
| LDH (IU/L)              | <i>n</i> = 44          | <i>n</i> = 26        | <i>n</i> = 18       | 0.28    |
| median [IQR]            | 353 [266–421.5]        | 315 [257–432]        | 371 [314–418]       |         |
| CK (mg/dL)              | <i>n</i> = 43          | <i>n</i> = 26        | <i>n</i> = 17       | 0.087   |
| median [IQR]            | 135 [78–235]           | 144.5 [107–353]      | 102 [64–222]        |         |
| Cr (mg/dL)              | <i>n</i> = 45          | <i>n</i> = 26        | <i>n</i> = 19       | 0.6     |
| median [IQR]            | 0.9 [0.8–1.2]          | 0.9 [0.7–1.2]        | 0.8 [0.8–1.1]       |         |
| BUN (mg/dL)             | <i>n</i> = 44          | <i>n</i> = 26        | <i>n</i> = 18       | 0.53    |
| median [IQR]            | 19.1 [14–24.1]         | 19.5 [14–26.9]       | 18.7 [15.5–22.9]    |         |
| CRP (mg/dL)             | <i>n</i> = 41          | <i>n</i> = 22        | <i>n</i> = 19       | 0.053   |
| median [IQR]            | 9.2 [3.4–14.2]         | 10.5 [4.9–20.5]      | 8.1 [2.9–12.7]      |         |
| PT-INR                  | <i>n</i> = 33          | <i>n</i> = 18        | <i>n</i> = 15       | 0.25    |
| median [IQR]            | 1.1 [1.1–1.2]          | 1.1 [1.1–1.1]        | 1.2 [1.1–1.3]       |         |

ALT, alanine aminotransferase; AST, aspartate aminotransferase; BUN, blood urea nitrogen; CK, creatine kinase; Cr, creatinine; CRP, C-reactive protein; Hb, hemoglobin; IQR, interquartile range; JSF, Japanese spotted fever; LDH, lactate dehydrogenase; PLT, platelet; PT-INR, prothrombin time-international normalized ratio; ST, scrub typhus; T-Bil, total bilirubin; WBC, white blood cell
